# Supplementary material for: A biocompatible cerasome based platform for direct electrochemistry of cholesterol oxidase and cholesterol sensing
Source: Royal Society of Chemistry journal article supplement (doi:10.1039/c6ra06368c), 2016-01-01
Supplement: c6ra06368c1.pdf [file c6ra06368c1.pdf]

## Supplementary Information

### A Biocompatible Cerasome Based Platform for Direct Electrochemistry of Cholesterol Oxidase and Cholesterol Sensing

Shuyao Wu,<sup>a</sup> Jiali Chen,<sup>a</sup> Daliang Liu,<sup>a</sup> Qian Zhuang,<sup>a</sup> Qi Pei,<sup>a</sup> Lixin Xia,<sup>b</sup> Qian Zhang,<sup>b,\*</sup> Jun-ichi Kikuchi,<sup>c</sup> Yoshio Hisaeda<sup>d</sup> and Xi-Ming Song<sup>a,d,\*</sup>

<sup>a</sup> Liaoning Key Laboratory for Green Synthesis and Preparative Chemistry of Advanced Materials, College of Chemistry, Liaoning University, Shenyang, China

<sup>b</sup> College of Chemistry, Liaoning University, Shenyang, China

<sup>c</sup> Graduate School of Materials Science, Nara Institute of Science and Technology, 8916-5 Takayama, Ikoma, Nara 630-0192, Japan

<sup>d</sup> Department of Chemistry and Biochemistry, Graduate School of Engineering, Kyushu University, 744 Motooka, Nishi-ku, Fukuoka 819-0395, Japan

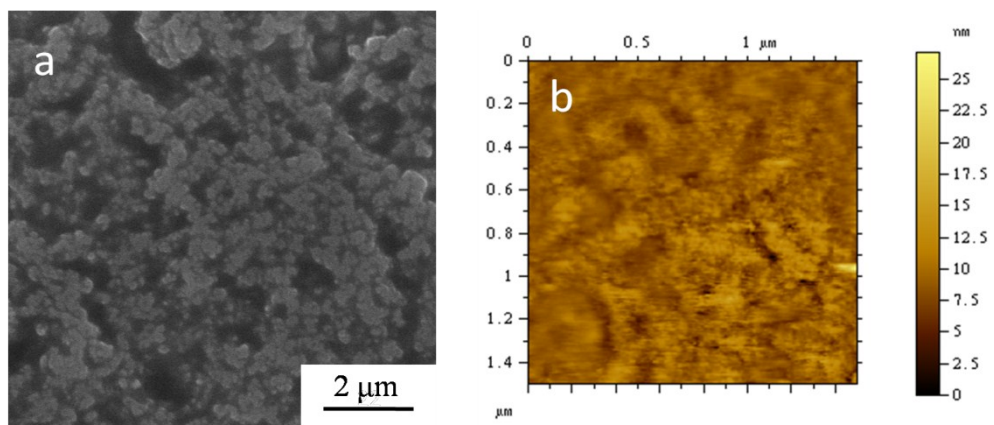

Fig. S1 SEM and AFM images of ChOx/cerasome/GCE.

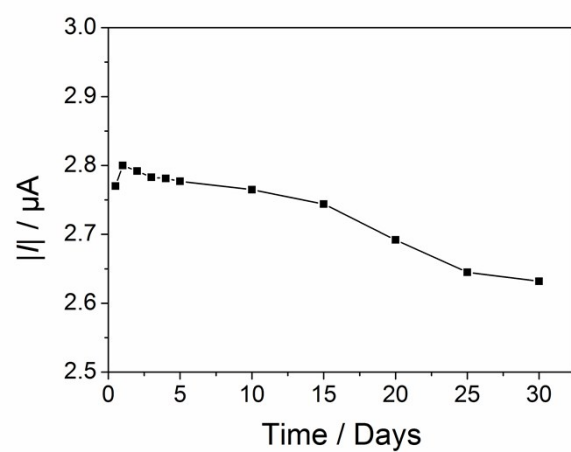

Fig. S2 Shelf-life curve of ChOx/cerasome/GCE as a function of time.
